# Supplementary material
Source: publisher figshare collection journal article supplement (https://karger.figshare.com/ndownloader/files/7342850)

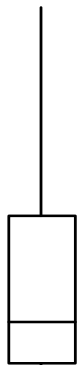

qRT-PCR: Ct value

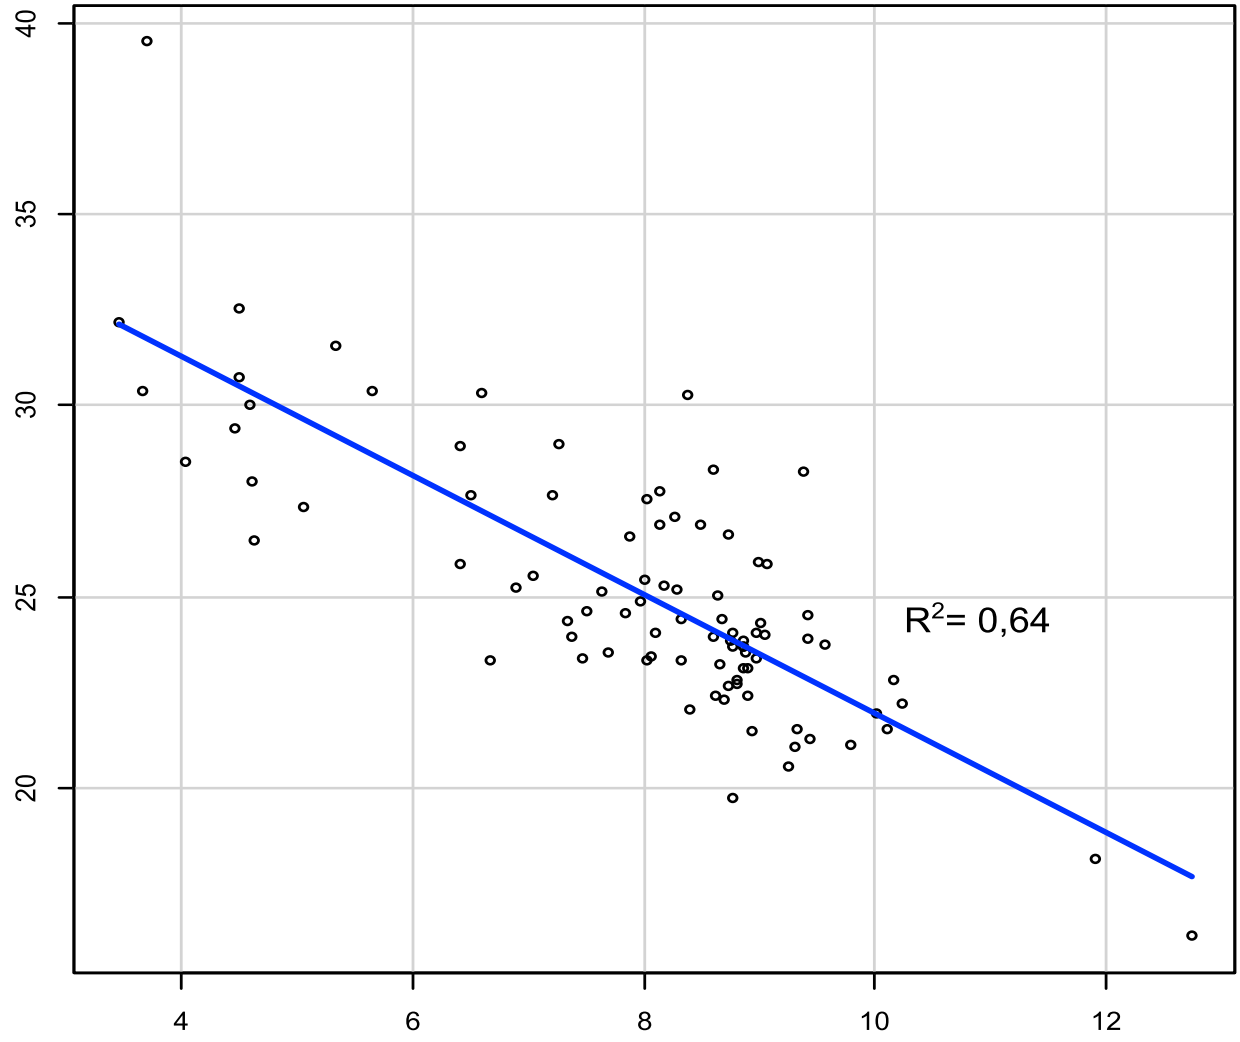

normalized microarray expression data

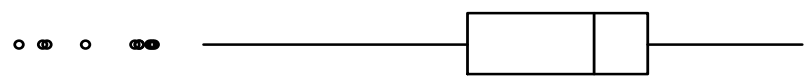

Supplement: Supplementary file 1 [file 7342850]
